# Supplementary material
Source: PubMed Central journal article supplement (PMC7856257)
Supplement: NIHMS1652325-supplement-Supplement.pdf [file NIHMS1652325-supplement-Supplement.pdf]

## **Supplemental Material**

### *Expanded Methods*

#### *Physiological and Biochemical Methods*

For intraperitoneal glucose tolerance tests (GTTs), mice were fasted for 11 h (2200 to 0900 h) with free access to drinking water. A baseline blood sample was collected from the tails of fully conscious mice, followed by intraperitoneal injection of glucose (2 g glucose/kg body weight), and blood was taken from the tails for glucose measurements at 0, 15, 30, 60, and 120 min<sup>51</sup>. The assessment of fat and lean mass was performed using an Echo-MRI-3-in-1.

#### *Comprehensive Lab Animal Monitoring System*

The Comprehensive Lab Animal Monitoring System (Oxymax Opto-M3; Columbus Instruments) was used to measure activity level, volume of O<sub>2</sub> consumption, volume of CO<sub>2</sub> production, and heat production. Total energy expenditure of mice was calculated as described previously<sup>52</sup>.

**Supplemental Table I. Exercise paradigm.**

| Weeks | Incline (%) | Total Daily Time (min) | Number of Sets | Fast Pace (m/min) | Recovery Pace (m/min) |
|-------|-------------|------------------------|----------------|-------------------|-----------------------|
| 1     | 5           | 40                     | 8              | 18                | 10                    |
| 2     | 10          | 50                     | 10             | 20                | 10                    |
| 3     | 15          | 60                     | 12             | 22                | 11                    |
| 4     | 20          | 70                     | 14             | 24                | 11                    |
| 5     | 20          | 80                     | 16             | 26                | 12                    |
| 6     | 20          | 80                     | 16             | 28                | 12                    |
| 7     | 20          | 80                     | 16             | 30                | 13                    |
| 8     | 20          | 80                     | 18             | 32                | 13                    |

**Supplemental Table II. Echocardiography parameters.**

|                | Heart Rate | Diameter (Systole) | Diameter (Diastole) | Volume (Systole) | Volume (Diastole) | Stroke Volume | Ejection Fraction | Cardiac Output | LV Mass    | LVPW (Systole) | LVPW (Diastole) |
|----------------|------------|--------------------|---------------------|------------------|-------------------|---------------|-------------------|----------------|------------|----------------|-----------------|
| Sham-Sedentary | 479.5±23.3 | 2.66±0.14          | 3.9±0.04            | 26.5±3.3         | 65.4±1.6          | 39.9±1.3      | 60.5±2.3          | 19.1±1.07      | 100.5±2.3  | 1.21±0.09      | 0.82±0.03       |
| Sham-Exercise  | 445.8±12.5 | 3.15±0.13*         | 4.30±0.09*          | 39.9±3.9*        | 78.6±4.3*         | 41.6±2.8      | 54.0±1.6          | 18.6±1.70      | 115.2±4.1* | 0.95±0.04      | 0.72±0.05       |
| +BAT           | 493.5±14.5 | 2.85±0.12          | 4.29±0.15*          | 31.1±3.3         | 77.0±2.1*         | 41.9±2.3      | 57.7±1.3          | 20.7±1.31      | 112.3±2.7* | 1.16±0.10      | 0.88±0.12       |

Data are mean ± S.E.M (n=6/group). Asterisks represent difference vs. Sham-Sedentary (\* $P$ <0.05).

**Supplemental Table III. Lipokine profile Sham-Sedentary vs. +BAT.**

|                          | <b>fold change</b> | <b>P value</b> | <b>False Discovery Rate</b> |
|--------------------------|--------------------|----------------|-----------------------------|
| Tetranor-12-HETE         | 0.746338           | 0.240576       | 0.45858                     |
| 9-oxoODE                 | -1.17266           | 0.244575       | 0.45858                     |
| 13-oxoODE                | -1.58813           | 0.172033       | 0.4318                      |
| 9-HOTrE                  | 0.833693           | 0.208932       | 0.44503                     |
| 13-HOTrE/13-HOTrE(r)     | -1.87207           | 0.139867       | 0.4188                      |
| 9-HODE                   | 1.340782           | 0.034358*      | 0.28108                     |
| 13-HODE                  | 0.905538           | 0.191443       | 0.44503                     |
| 9(10)-EpOME              | -1.45245           | 0.209943       | 0.44503                     |
| 12(13)-EpOME             | 1.63017            | 0.016309*      | 0.24464                     |
| 9,10-diHOME              | 2.166779           | 0.00148**      | 0.0666                      |
| 12,13-diHOME             | 2.147632           | 0.000683***    | 0.06147                     |
| 15-deoxy-delta12,14-PGJ2 | -0.30135           | 0.745039       | 0.87111                     |
| 15-oxoETE                | -2.51279           | 0.102241       | 0.3834                      |
| 18-HEPE                  | -2.15289           | 0.055221       | 0.33133                     |
| 15-HEPE                  | -1.84802           | 0.153561       | 0.4188                      |
| 12-HEPE                  | 1.331356           | 0.062463       | 0.33904                     |
| 5-HEPE                   | 0.22954            | 0.754964       | 0.87111                     |
| 11-HEPE                  | 0.925116           | 0.129063       | 0.40054                     |
| 8-HEPE                   | -1.37195           | 0.229147       | 0.44833                     |
| 9-HEPE                   | 1.072625           | 0.117898       | 0.39568                     |
| 12-oxoETE                | 1.117024           | 0.037477*      | 0.28108                     |
| 14(15)-EpETE             | 0.27015            | 0.657054       | 0.85703                     |
| 5-oxoETE                 | -2.14551           | 0.118705       | 0.39568                     |
| 14(15)-EET               | -2.52179           | 0.099651       | 0.3834                      |
| 15-HETE                  | -0.20725           | 0.769261       | 0.87534                     |
| 12-HETE                  | 0.771612           | 0.17272        | 0.4318                      |
| 5-HETE                   | -2.32542           | 0.112311       | 0.39568                     |
| 20-HETE                  | 1.714065           | 0.054428       | 0.33133                     |
| 11-HETE                  | 0.210013           | 0.72949        | 0.87111                     |
| 17-HETE                  | 0.660987           | 0.223723       | 0.44745                     |
| 18-HETE                  | 0.866479           | 0.101297       | 0.3834                      |
| 9-HETE                   | 0.803715           | 0.17882        | 0.43497                     |
| 8-HETE                   | 0.696643           | 0.19899        | 0.44503                     |
| 5-HETrE                  | 1.325602           | 0.212626       | 0.44503                     |

|                            |          |            |         |
|----------------------------|----------|------------|---------|
| 8-HETrE                    | 1.37088  | 0.008378** | 0.24464 |
| 15-HETrE                   | -0.13612 | 0.842102   | 0.89164 |
| 12-oxoLTB4                 | -3.01622 | 0.085809   | 0.36775 |
| PGA2/PGJ2                  | -0.16002 | 0.825793   | 0.88585 |
| PGB2                       | 0.340306 | 0.580272   | 0.81435 |
| 15-deoxy-delta12,14-PGD2   | 1.141287 | 0.027757*  | 0.27757 |
| 13,14-dihydro-15-keto PGA2 | -0.24388 | 0.740336   | 0.87111 |
| Bicyclo PGE2               | -0.87035 | 0.333083   | 0.56221 |
| delta12-PGJ2               | -0.25811 | 0.735944   | 0.87111 |
| LTB4                       | -0.15164 | 0.826794   | 0.88585 |
| 5,6-diHETE                 | -1.90229 | 0.147731   | 0.4188  |
| Hepoxilin A3               | -0.4368  | 0.588143   | 0.81435 |
| 17,18-diHETE               | 1.03871  | 0.06404    | 0.33904 |
| PGA1                       | -0.38828 | 0.677918   | 0.87111 |
| 5,6-diHETrE                | -1.21573 | 0.267578   | 0.48164 |
| 8,9-diHETrE                | 0.202183 | 0.750805   | 0.87111 |
| 11,12-diHETrE              | 0.491953 | 0.421531   | 0.64301 |
| 14,15-diHETrE              | 0.389207 | 0.512368   | 0.75595 |
| 2,3-dinor TxB2             | -0.09871 | 0.914098   | 0.93594 |
| 17-HDHA                    | -0.46342 | 0.5592     | 0.79886 |
| 14-HDHA                    | 0.552809 | 0.390752   | 0.61698 |
| 7-HDHA                     | 0.353102 | 0.549474   | 0.79762 |
| 4-HDHA                     | -0.82893 | 0.355457   | 0.57127 |
| 8-HDHA                     | 0.852695 | 0.199495   | 0.44503 |
| 10-HDHA                    | 1.308327 | 0.082333   | 0.36775 |
| 11-HDHA                    | 0.206038 | 0.745001   | 0.87111 |
| 13-HDHA                    | -0.07169 | 0.928007   | 0.93843 |
| 16-HDHA                    | -0.18864 | 0.787805   | 0.87534 |
| 20-HDHA                    | 0.06776  | 0.91514    | 0.93594 |
| 19(20)-EpDPE               | 0.972918 | 0.085333   | 0.36775 |
| 16(17)-EpDPE               | -0.37171 | 0.618412   | 0.82199 |
| PGD3/PGE3                  | -2.13759 | 0.126826   | 0.40054 |
| 13,14-dihydro-15-keto PGE2 | -0.59027 | 0.466985   | 0.70048 |
| 13,14-dihydro-15-keto PGD2 | -0.83878 | 0.354377   | 0.57127 |
| 15-keto-PGF2a              | -0.16169 | 0.814856   | 0.88585 |
| PGE2/PGD2                  | -0.38273 | 0.609073   | 0.82199 |
| PGD2                       | 0.181338 | 0.780166   | 0.87534 |
| LXA4                       | -0.02571 | 0.970212   | 0.97021 |
| LXB4                       | -1.74088 | 0.16643    | 0.4318  |

|                                 |          |           |         |
|---------------------------------|----------|-----------|---------|
| PGF2a                           | 1.400233 | 0.032543* | 0.28108 |
| 8-iso PGF2a                     | 1.56653  | 0.016178* | 0.24464 |
| 5-iPF2a-VI                      | 0.842224 | 0.250195  | 0.45954 |
| PGE1/PGD1                       | 0.57967  | 0.29853   | 0.52682 |
| 11-beta-PGF2a/PGF2b             | 1.448005 | 0.015767* | 0.24464 |
| 13,14-dihydro-15-keto PGF2a     | .        | 0.055221  | 0.33133 |
| PD1                             | -1.817   | 0.149038  | 0.4188  |
| 19,20-diHDP A                   | -0.07156 | 0.914667  | 0.93594 |
| TxB3                            | 2.083207 | 0.027453* | 0.27757 |
| 6-keto PGE1                     | -1.40663 | 0.221734  | 0.44745 |
| TxB2                            | 1.283248 | 0.022976* | 0.27757 |
| 6-keto-PGF1a                    | -0.36822 | 0.621058  | 0.82199 |
| 19/20-OH PGF2a                  | -1.08634 | 0.306676  | 0.53079 |
| 6,15-diketo-13,14-dihydro PGF1a | -3.74189 | 0.07145   | 0.35725 |
| RvD1                            | 0.657904 | 0.416588  | 0.64301 |
| PGF1a                           | 0.560558 | 0.337324  | 0.56221 |
| 13,14-dihydro PGE1              | 0.219825 | 0.720816  | 0.87111 |

(\* $P < 0.05$ ; \*\* $P < 0.01$ ; \*\*\* $P < 0.001$  vs. Sham-Sedentary).

**Supplemental Table IV. Lipokine profile Sham-Sedentary vs. Sham-Exercise.**

|                          | <b>fold change</b> | <b>P value</b> | <b>False Discovery Rate</b> |
|--------------------------|--------------------|----------------|-----------------------------|
| Tetranor-12-HETE         | -0.10188           | 0.85862        | 0.93282                     |
| 9-oxoODE                 | -0.83386           | 0.261571       | 0.57418                     |
| 13-oxoODE                | -0.72764           | 0.328123       | 0.64686                     |
| 9-HOTrE                  | 1.502456           | 0.007199**     | 0.16198                     |
| 13-HOTrE/13-HOTrE(r)     | -1.12371           | 0.174946       | 0.44934                     |
| 9-HODE                   | 1.028299           | 0.053567       | 0.35299                     |
| 13-HODE                  | 1.107356           | 0.04955*       | 0.35299                     |
| 9(10)-EpOME              | 1.11076            | 0.053513       | 0.35299                     |
| 12(13)-EpOME             | 1.112305           | 0.067617       | 0.35299                     |
| 9,10-diHOME              | 1.537453           | 0.001878**     | 0.07989                     |
| 12,13-diHOME             | 1.610793           | 0.000915***    | 0.07989                     |
| 15-deoxy-delta12,14-PGJ2 | -0.76385           | 0.387432       | 0.66441                     |
| 15-oxoETE                | -2.14479           | 0.060857       | 0.35299                     |
| 18-HEPE                  | -0.72327           | 0.456435       | 0.70826                     |

|                            |          |            |         |
|----------------------------|----------|------------|---------|
| 15-HEPE                    | 0.081048 | 0.90784    | 0.94133 |
| 12-HEPE                    | 0.436088 | 0.38565    | 0.66441 |
| 5-HEPE                     | 0.493319 | 0.525706   | 0.71687 |
| 11-HEPE                    | 0.143068 | 0.809682   | 0.92242 |
| 8-HEPE                     | -0.79849 | 0.274896   | 0.58906 |
| 9-HEPE                     | 0.233836 | 0.631299   | 0.81167 |
| 12-oxoETE                  | 0.353496 | 0.567534   | 0.74955 |
| 14(15)-EpETE               | 0.156006 | 0.790128   | 0.92242 |
| 5-oxoETE                   | -1.80195 | 0.081026   | 0.35299 |
| 14(15)-EET                 | -0.54511 | 0.406029   | 0.66441 |
| 15-HETE                    | -0.44879 | 0.481946   | 0.71687 |
| 12-HETE                    | 0.504761 | 0.292248   | 0.59778 |
| 5-HETE                     | -1.04996 | 0.179735   | 0.44934 |
| 20-HETE                    | -0.11454 | 0.909952   | 0.94133 |
| 11-HETE                    | -0.57423 | 0.380431   | 0.66441 |
| 17-HETE                    | 0.495706 | 0.28163    | 0.58946 |
| 18-HETE                    | 0.924867 | 0.04522*   | 0.35299 |
| 9-HETE                     | 0.342999 | 0.472566   | 0.71687 |
| 8-HETE                     | 0.454108 | 0.330619   | 0.64686 |
| 5-HETrE                    | 1.599462 | 0.002663** | 0.07989 |
| 8-HETrE                    | 0.638499 | 0.170639   | 0.44934 |
| 15-HETrE                   | 0.046265 | 0.932767   | 0.95397 |
| 12-oxoLTB4                 | -2.53557 | 0.046628*  | 0.35299 |
| PGA2/PGJ2                  | -1.8389  | 0.07725    | 0.35299 |
| PGB2                       | -0.60843 | 0.435842   | 0.68817 |
| 15-deoxy-delta12,14-PGD2   | -0.68835 | 0.34729    | 0.65117 |
| 13,14-dihydro-15-keto PGA2 | -1.09276 | 0.192214   | 0.46755 |
| Bicyclo PGE2               | -1.72971 | 0.088128   | 0.35299 |
| delta12-PGJ2               | -2.18209 | 0.060324   | 0.35299 |
| LTB4                       | -0.81131 | 0.256434   | 0.57418 |
| 5,6-diHETE                 | -1.19038 | 0.149562   | 0.42429 |
| Hepoxilin A3               | -0.59434 | 0.399386   | 0.66441 |
| 17,18-diHETE               | 0.478425 | 0.512204   | 0.71687 |
| PGA1                       | -1.52989 | 0.146919   | 0.42429 |
| 5,6-diHETrE                | -0.46034 | 0.574657   | 0.74955 |
| 8,9-diHETrE                | 0.243203 | 0.733164   | 0.8798  |
| 11,12-diHETrE              | 0.107886 | 0.861377   | 0.93282 |
| 14,15-diHETrE              | 0.252023 | 0.688811   | 0.8461  |
| 2,3-dinor TxB2             | -0.82158 | 0.39866    | 0.66441 |

|                                 |          |           |         |
|---------------------------------|----------|-----------|---------|
| 17-HDHA                         | -2.17546 | 0.063726  | 0.35299 |
| 14-HDHA                         | 0.077762 | 0.880997  | 0.93282 |
| 7-HDHA                          | -1.50983 | 0.150857  | 0.42429 |
| 4-HDHA                          | -1.72495 | 0.100655  | 0.36544 |
| 8-HDHA                          | -0.0433  | 0.958732  | 0.96583 |
| 10-HDHA                         | 0.337663 | 0.487813  | 0.71687 |
| 11-HDHA                         | -0.02297 | 0.965825  | 0.96583 |
| 13-HDHA                         | -0.22742 | 0.695682  | 0.8461  |
| 16-HDHA                         | 0.174761 | 0.754284  | 0.89323 |
| 20-HDHA                         | -0.15189 | 0.829791  | 0.93282 |
| 19(20)-EpDPE                    | 0.76316  | 0.102611  | 0.36544 |
| 16(17)-EpDPE                    | -0.26133 | 0.656385  | 0.83204 |
| PGD3/PGE3                       | -2.48934 | 0.055078  | 0.35299 |
| 13,14-dihydro-15-keto PGE2      | -1.70646 | 0.086657  | 0.35299 |
| 13,14-dihydro-15-keto PGD2      | -1.73327 | 0.090208  | 0.35299 |
| 15-keto-PGF2a                   | -0.83845 | 0.261478  | 0.57418 |
| PGE2/PGD2                       | -1.44602 | 0.111553  | 0.36544 |
| PGD2                            | -2.03888 | 0.069933  | 0.35299 |
| LXA4                            | -1.48823 | 0.113691  | 0.36544 |
| LXB4                            | -0.51568 | 0.419927  | 0.67488 |
| PGF2a                           | -0.53644 | 0.405108  | 0.66441 |
| 8-iso PGF2a                     | -0.40091 | 0.513415  | 0.71687 |
| 5-iPF2a-VI                      | 0.460374 | 0.346435  | 0.65117 |
| PGE1/PGD1                       | -1.16796 | 0.178035  | 0.44934 |
| 11-beta-PGF2a/PGF2b             | -0.41401 | 0.501678  | 0.71687 |
| 13,14-dihydro-15-keto PGF2a     | -1.55696 | 0.107029  | 0.36544 |
| PD1                             | -2.83357 | 0.040073* | 0.35299 |
| 19,20-diHDPa                    | -0.42274 | 0.554635  | 0.74503 |
| TxB3                            | -0.1006  | 0.876469  | 0.93282 |
| 6-keto PGE1                     | -2.25626 | 0.058617  | 0.35299 |
| TxB2                            | -0.09297 | 0.867369  | 0.93282 |
| 6-keto-PGF1a                    | -1.70406 | 0.088535  | 0.35299 |
| 19/20-OH PGF2a                  | 0.617815 | 0.252181  | 0.57418 |
| 6,15-diketo-13,14-dihydro PGF1a | -1.47151 | 0.126195  | 0.39164 |
| RvD1                            | -0.42469 | 0.521566  | 0.71687 |
| PGF1a                           | 0.21776  | 0.669666  | 0.83708 |
| 13,14-dihydro PGE1              | -0.1426  | 0.806903  | 0.92242 |

(\* $P < 0.05$ ; \*\* $P < 0.01$ ; \*\*\* $P < 0.001$  vs. Sham-Sedentary).

**Supplemental Table V. Echocardiography parameters.**

|                    | Heart Rate  | Diameter (Systole) | Diameter (Diastole) | Volume (Systole) | Volume (Diastole) | Stroke Volume | Ejection Fraction | Cardiac Output | LV Mass     | LVPW (Systole) | LVPW (Diastole) |
|--------------------|-------------|--------------------|---------------------|------------------|-------------------|---------------|-------------------|----------------|-------------|----------------|-----------------|
| <b>Baseline</b>    | 409.5±18.4  | 2.74±0.10          | 3.9±0.12            | 28.4±2.5         | 66.7±4.6          | 38.3±2.9      | 57.5±2.0          | 15.6±1.33      | 111.9±8.0   | 1.10±0.05      | 0.76±0.04       |
| <b>Sham</b>        | 438.8±12.9  | 3.11±0.09          | 4.07±0.05           | 38.6±2.8         | 73.0±2.3          | 34.4±2.0      | 44.2±2.7**        | 15.0±0.65      | 149.9±10.8* | 1.07±0.10*     | 0.95±0.08       |
| <b>TNT-Ephx1/2</b> | 491.7±21.3* | 2.97±0.11          | 4.13±0.13           | 34.7±3.0         | 76.1±5.8          | 41.3±4.0      | 52.1±2.7          | 20.4±2.13      | 121.8±8.8   | 1.07±0.05      | 0.78±0.03       |
| <b>TNT-Ucp1</b>    | 458.2±16.4  | 3.31±0.19*         | 4.41±0.16*          | 45.3±6.1*        | 89.0±7.5*         | 43.7±2.1      | 47.4±2.8*         | 20.0±1.29      | 146.1±4.5*  | 0.97±0.08      | 0.78±0.04       |

Data are mean ± S.E.M. Baseline (n=8), Sham (n=5), TNT-Ephx1/2 (n=7), or TNT-Ucp1 (n=5). Data are mean ± S.E.M Asterisks represent differences compared to baseline cohort (\* $P<0.05$ ; \*\* $P<0.01$ ).

**Supplemental Table VI. Human subject characteristics.**

|                               | Healthy                 | Heart Disease |
|-------------------------------|-------------------------|---------------|
| <b>Sex no.</b>                |                         |               |
| Male                          | 25                      | 17            |
| Female                        | 26                      | 7             |
| <b>Age (years)</b>            |                         |               |
| Male                          | 56.3 ± 4.4              | 65.4 ± 2.4    |
| Female                        | 43.2 ± 3.1 <sup>s</sup> | 62.4 ± 7.4    |
| <b>BMI (kg/m<sup>2</sup>)</b> |                         |               |
| Male                          | 24.8 ± 1.1              | 26.5 ± 2.7    |
| Female                        | 23.4 ± 0.4              | 26.1 ± 1.9    |
| <b>Glucose (mg/dL)</b>        |                         |               |
| Male                          | 93.1 ± 2.5              | 137.1 ± 12.2* |
| Female                        | 90.5 ± 3.9              | 97.1 ± 4.2    |

Data are Mean ± SEM. \* $P<0.05$  heart disease males vs. healthy males; <sup>s</sup> $P<0.05$  healthy females vs. healthy males.



# Supplemental Figure I

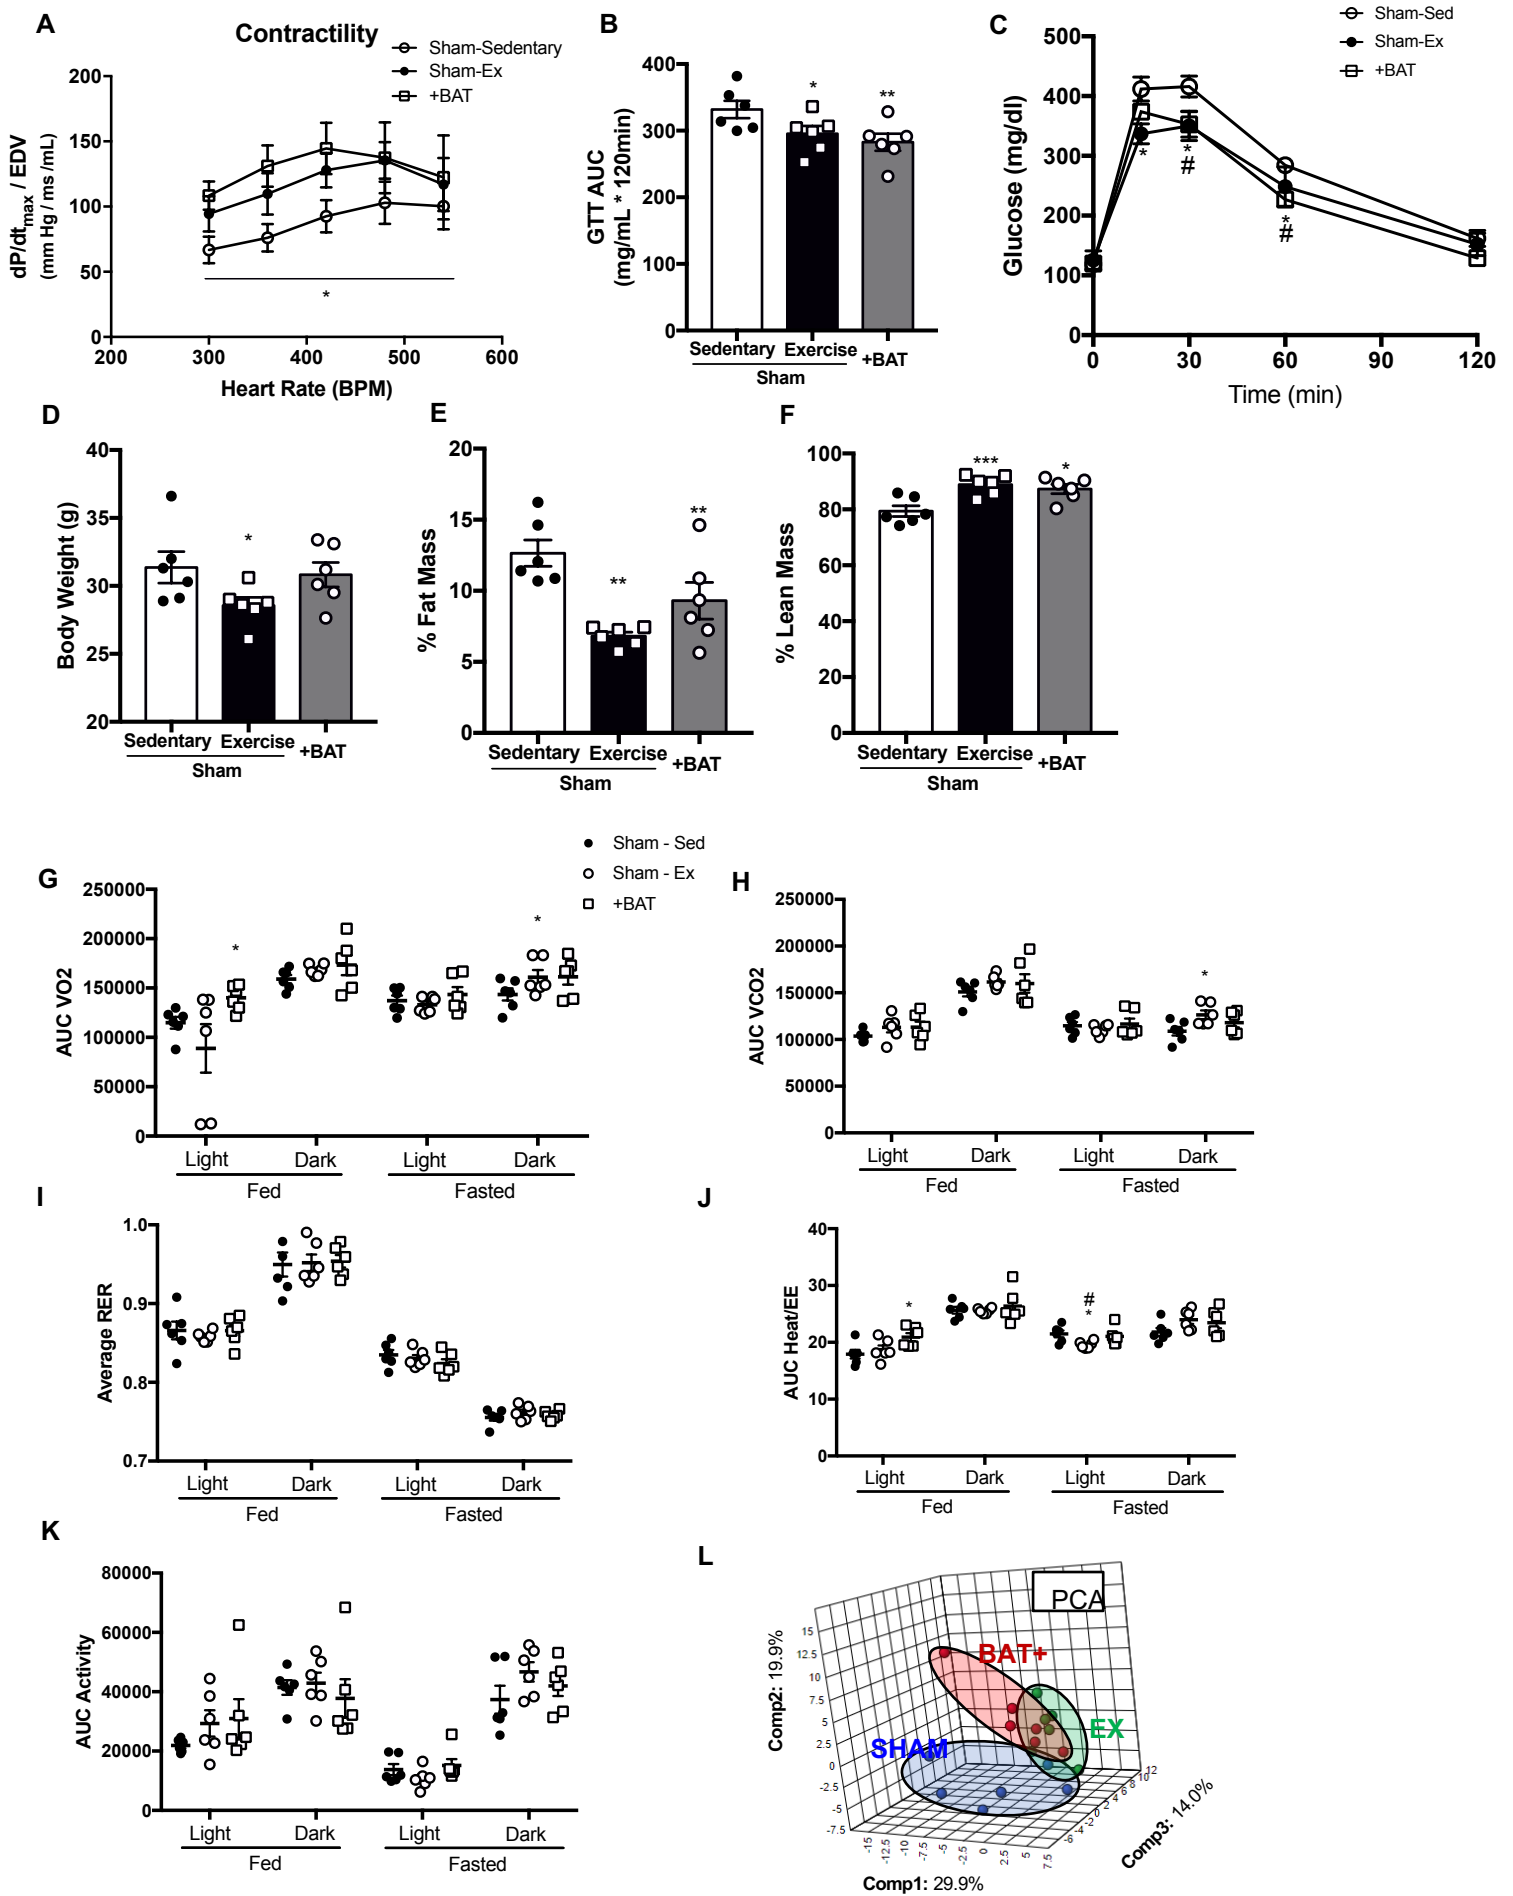

# Supplemental Figure II

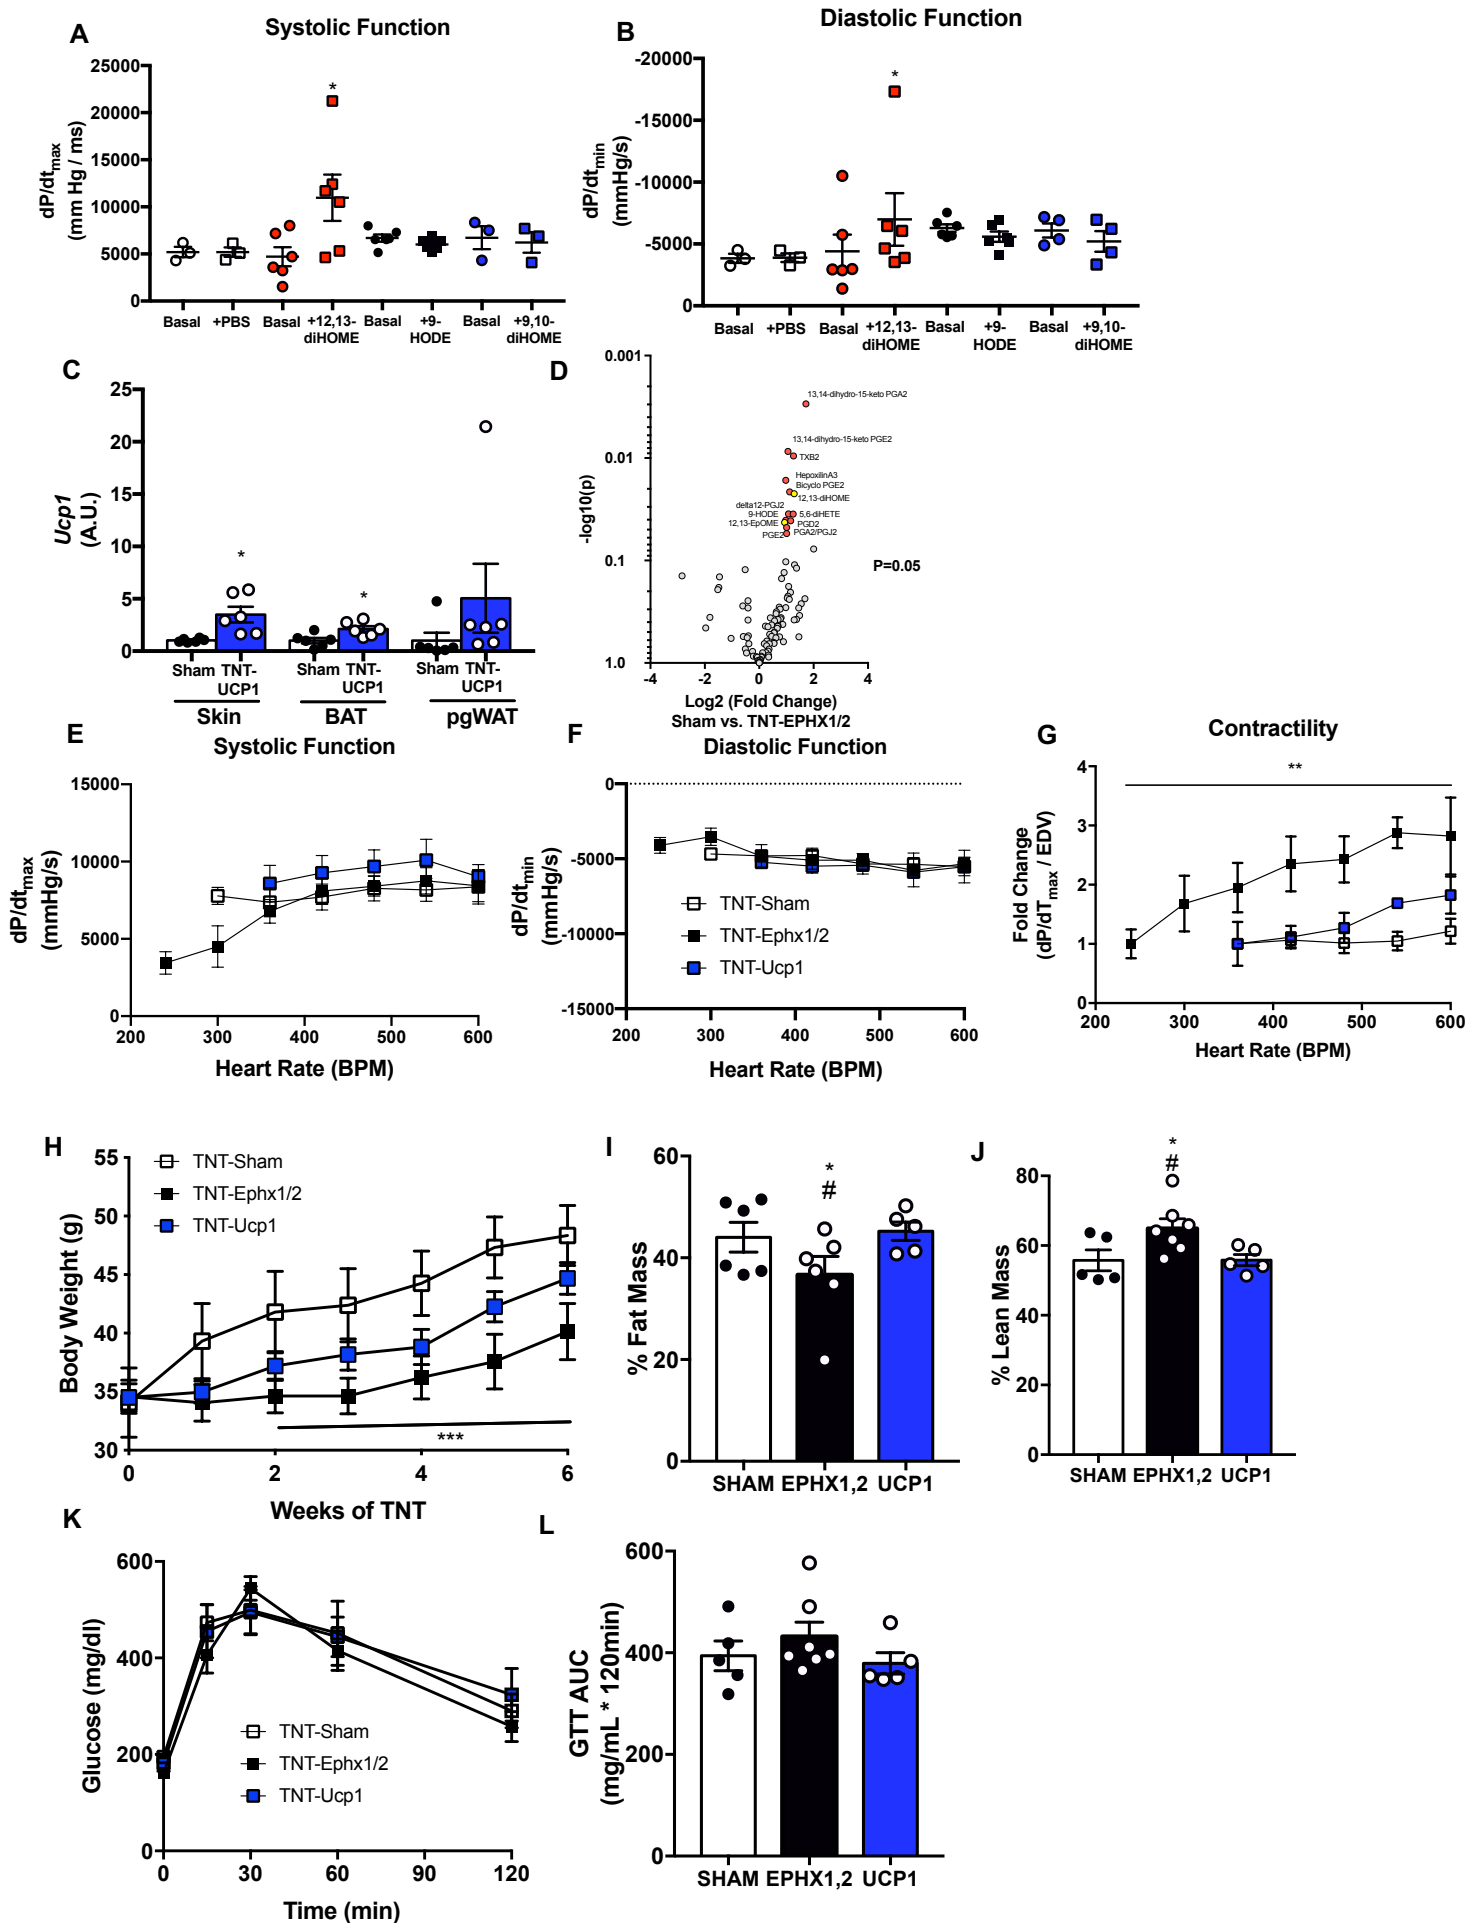

# Supplemental Figure III

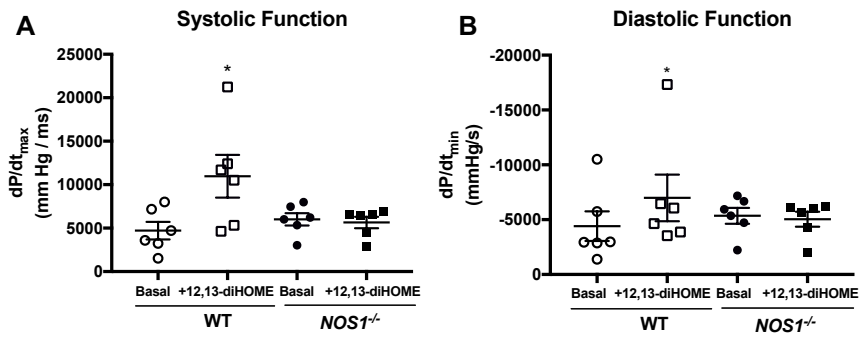

## Supplemental Figures Legends.

### Supplemental Figure I. Exercise and +BAT have similar effects on metabolic health.

(A) Contractility (dp/dt max normalized by EDV), (B) glucose tolerance test area under the curve (GTT AUC), (C) glucose excursion curve, (D) body weight, (E) % fat mass, (F) % lean mass, (G)  $V_{O_2}$ , (H)  $V_{CO_2}$ , (I) RER, (J) Heat/energy expenditure, and (K) activity in Sham-Sedentary, Sham-Exercised, or +BAT mice 12 wks after transplantation (8 wks of exercise). Data are mean  $\pm$  S.E.M (n=6/group). Asterisks represent difference vs. Sham-Sedentary (\* $P$ <0.05; \*\* $P$ <0.01; \*\*\* $P$ <0.001). (L) Principal component analysis (PCA) of serum oxylipins from Sham-Sedentary, Sham-Exercised, or +BAT mice 12 wks after transplantation (8 wks of exercise). One-way ANOVA was used for **B, D, E, F, G, H, I, and J** with Tukey's multiple comparisons tests. Two-way ANOVA was used for **A and C** with Tukey's multiple comparisons tests.

### Supplemental Figure II. Effects of sustained treatment with 12,13-diHOME (TNT) metabolism and cardiac function.

(A) Systolic and (B) diastolic function in mice acutely injected with saline (n=3), 12,13-diHOME (n=8), 9-HODE (n=5), or 9,10-diHOME (n=3). Data are mean  $\pm$  S.E.M. Asterisks represent difference compared to all other groups (\* $P$ <0.05; \*\* $P$ <0.01). (C) Gene expression data of *Ucp1* in skin, BAT, and pgWAT of Sham and TNT-Ucp1 mice. Data are mean  $\pm$  S.E.M. Asterisks represent difference compared to all other groups (\* $P$ <0.05). (D) Volcano plot representing 88 lipids comparing the fold induction of Sham and TNT-Ephx1/2 mice to the p value. (E) Systolic function and (F) diastolic function measured by *in vivo* cardiac hemodynamics. Data are mean  $\pm$  S.E.M (n=5-7/group). (G) Contractility (dp/dt max normalized per EDV) Data are mean  $\pm$  S.E.M (n=5-7/group). (H) Body weight, (I) % fat mass, and (J) % lean mass after 6 wks of TNT. (K) GTT AUC, and (L) glucose excursion curve after 6 wks of TNT. Asterisks represent difference compared to Sham (\* $P$ <0.05; \*\* $P$ <0.01; \*\*\* $P$ <0.001); # represent differences compared to TNT-Ucp1 (# $P$ <0.05). Paired two-tailed Student's t-test was used for **A and B**. Unpaired two-tailed Student's t-test was used for **C**. Two-way ANOVA was used for **E, F, G, H, and K** with Tukey's multiple comparisons tests. One-way ANOVA was used for **I, J, and L** with Tukey's multiple comparisons tests.

### Supplemental Figure III. Effects of acute treatment with 12,13-diHOME on cardiac function in *NOS1<sup>-/-</sup>* mice.

(A) Systolic and (B) diastolic function in WT mice (n=6) or *NOS1<sup>-/-</sup>* mice (n=6) acutely injected with 12,13-diHOME. Data are mean  $\pm$  S.E.M. Asterisks represent difference compared to pre-injection values (\* $P$ <0.05). Paired two-tailed Student's t-test was used for **A and B**.

### Supplementary Video 1

Representative imaging of FFA-SS-Luc uptake in cardiomyocytes isolated from *LucTg* mice and treated with 12,13-diHOME or vehicle and then incubate with luciferin-conjugated fatty acid. Data from individual images using sequential 3 min exposures over approximately 30 minutes was stacked into a movie. The wells on the left are vehicle treated, while the wells on the right are treated with 12,13-diHOME.
